# Supplementary material
Source: PubMed Central journal article supplement (PMC2631303)
Supplement: JCI0937432sd.pdf [file JCI0937432sd.pdf]

### Supplementary Table 1

Demographic and fasting biochemical details of controls (n=6).

|                            | <b>Mean</b> | <b>Range</b>             |
|----------------------------|-------------|--------------------------|
| Gender                     |             | <b>5 males, 1 female</b> |
| Age (years)                | <b>27.2</b> | <b>24-33</b>             |
| Weight (kg)                | <b>76.3</b> | <b>68.7-86.4</b>         |
| BMI (kg/m <sup>2</sup> )   | <b>25.0</b> | <b>21.9-28.0</b>         |
| Leptin (µg/L)              | <b>6.0</b>  | <b>0.2-12.0</b>          |
| Adiponectin (mg/L)         | <b>5.1</b>  | <b>1.5- 7.3</b>          |
| Total cholesterol (mmol/L) | <b>4.3</b>  | <b>3.6-4.6</b>           |
| Triglycerides (mmol/L)     | <b>0.7</b>  | <b>0.6-1.2</b>           |
| HDL-Cholesterol (mmol/L)   | <b>1.6</b>  | <b>1.3- 2.2</b>          |
| Fasting glucose (mmol/L)   | <b>4.5</b>  | <b>3.7-4.9</b>           |
| Fasting insulin (pmol/L)   | <b>24.3</b> | <b>17.0-29.0</b>         |
